# Supplementary material for: Mortality and Function After Widowhood Among Older Adults With Dementia, Cancer, or Organ Failure
Source: PubMed Central journal article supplement (PMC11393717; doi:10.1001/jamanetworkopen.2024.32979), 2024-09-12
Supplement: jamanetwopen-e2432979-s002.pdf [file jamanetwopen-e2432979-s002.pdf]

## Data Sharing Statement

Rodin. Mortality and Function After Widowhood Among Older Adults With Dementia, Cancer, or Organ Failure. *JAMA Netw Open*. Published September 12, 2024.

doi:10.1001/jamanetworkopen.2024.32979

### Data

**Data available:** No

### Additional Information

**Explanation for why data not available:** The existing HRS dataset contains data that have already been collected and re-contacting participants is not possible. Access to the data requires the completion of a data use agreement, which prohibits any redistribution of the data to other researchers or attempts to re-identify research participants. Researchers may access the data by requesting it and executing and a data use agreement with CMS.
